# Supplementary material
Source: PubMed Central journal article supplement (PMC6371803)
Supplement: NIHMS1502850-supplement-Supplemental_Digital_Content_to_Be_Published__cited_in_text_.pdf [file NIHMS1502850-supplement-Supplemental_Digital_Content_to_Be_Published__cited_in_text_.pdf]

**Figure S1: Dendrogram of the Gene Expression Similarity between RNAseq samples based on normalized gene expression.**

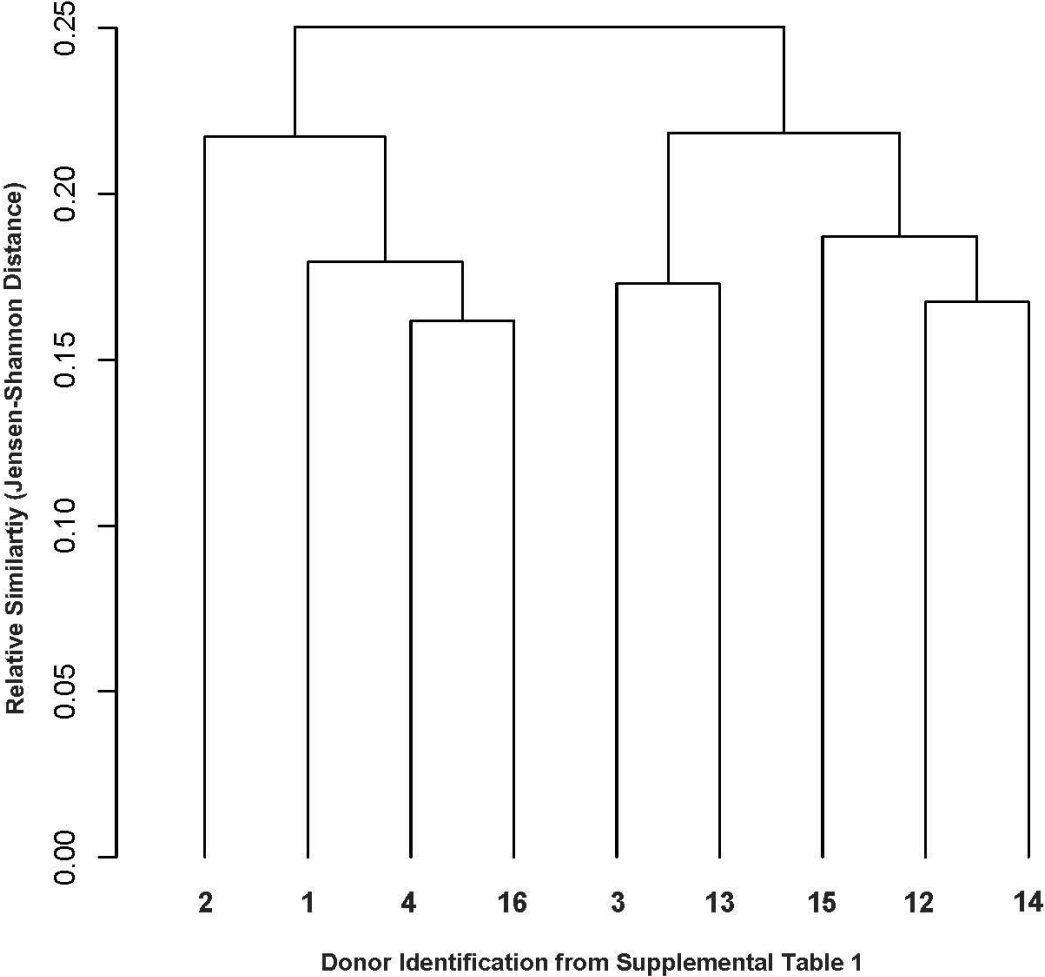

The dendrogram visualizes the Jensen-Shannon distances between conditions based on normalized gene expression. Static cold storage (SCS) preservation samples cluster more similarly than partial or full persufflation (SCS+PSF) preservation samples. Identifiers correspond to Table 1; SCS samples are numbers 7,6,5,3 and SCS+PSF are numbers 18,15,17,15,16. The Jensen-Shannon divergence for one SCS and one SCS+PSF clustered more closely with the other group.

Figure S2: Volcano Plot of Global Gene Expression.

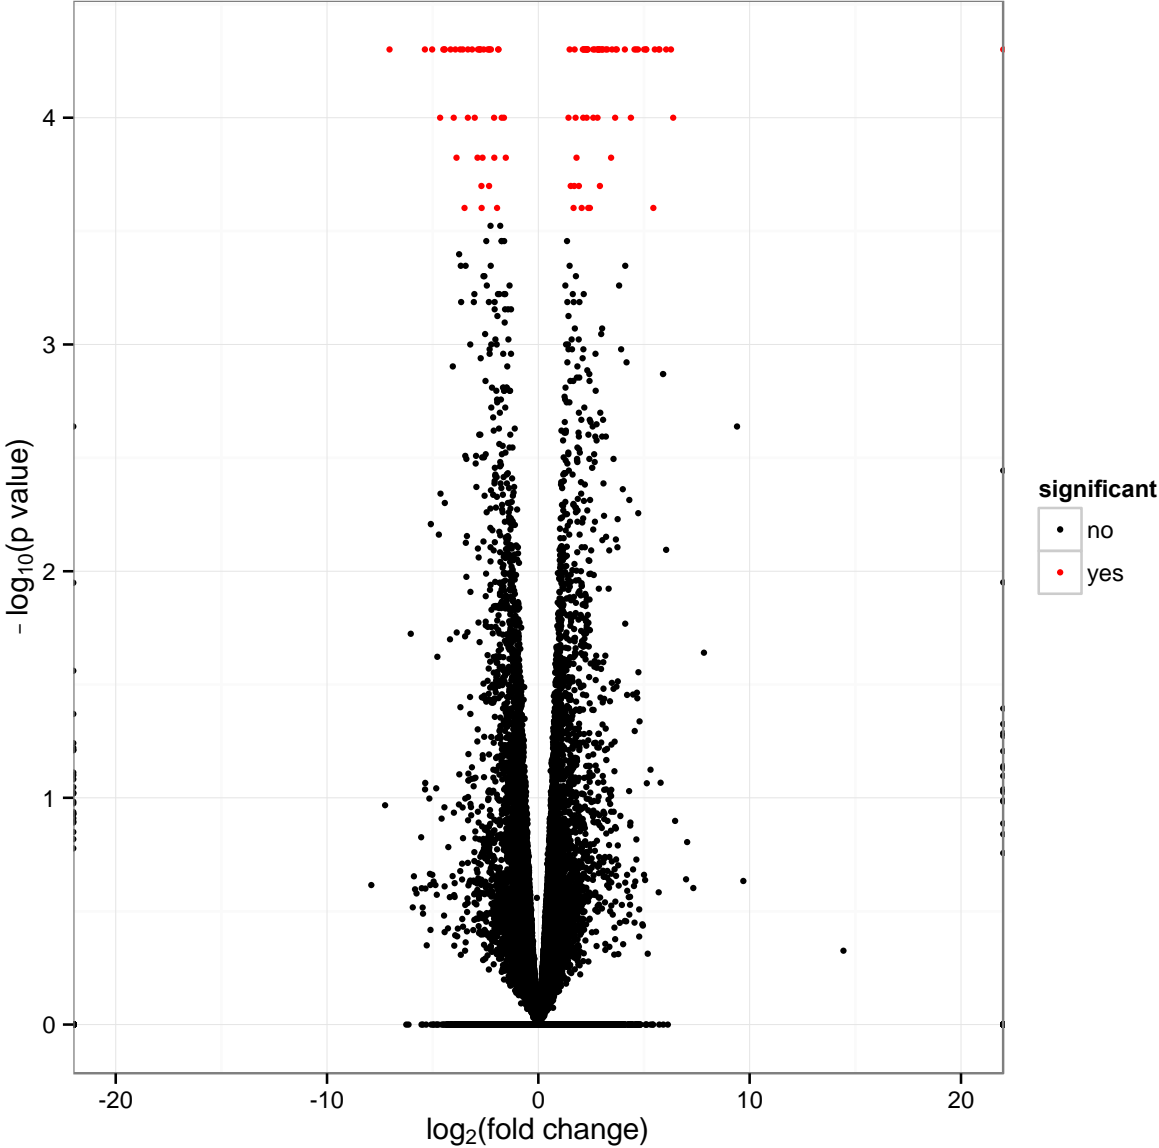

Gene transcripts that were detected in RNAseq analysis comparing islet mRNA from conditional groups are plotted as means for log<sub>2</sub> fold change (x-axis) and p value of the multiple testing correction analysis (y-axis). Differentially expressed genes ( $P < 0.05$ ) between islets from persufflated and SCS organs are denoted in red, whereas nonsignificant genes are represented with black dots.
